# Supplementary material
Source: Research Square preprint supplement (doi:10.21203/rs.3.rs-10345785/v1)
Supplement: Supplementary file 1 [file 8854eb782e4879251cf4652b.docx]

# Appendix A. Supplementary analyses


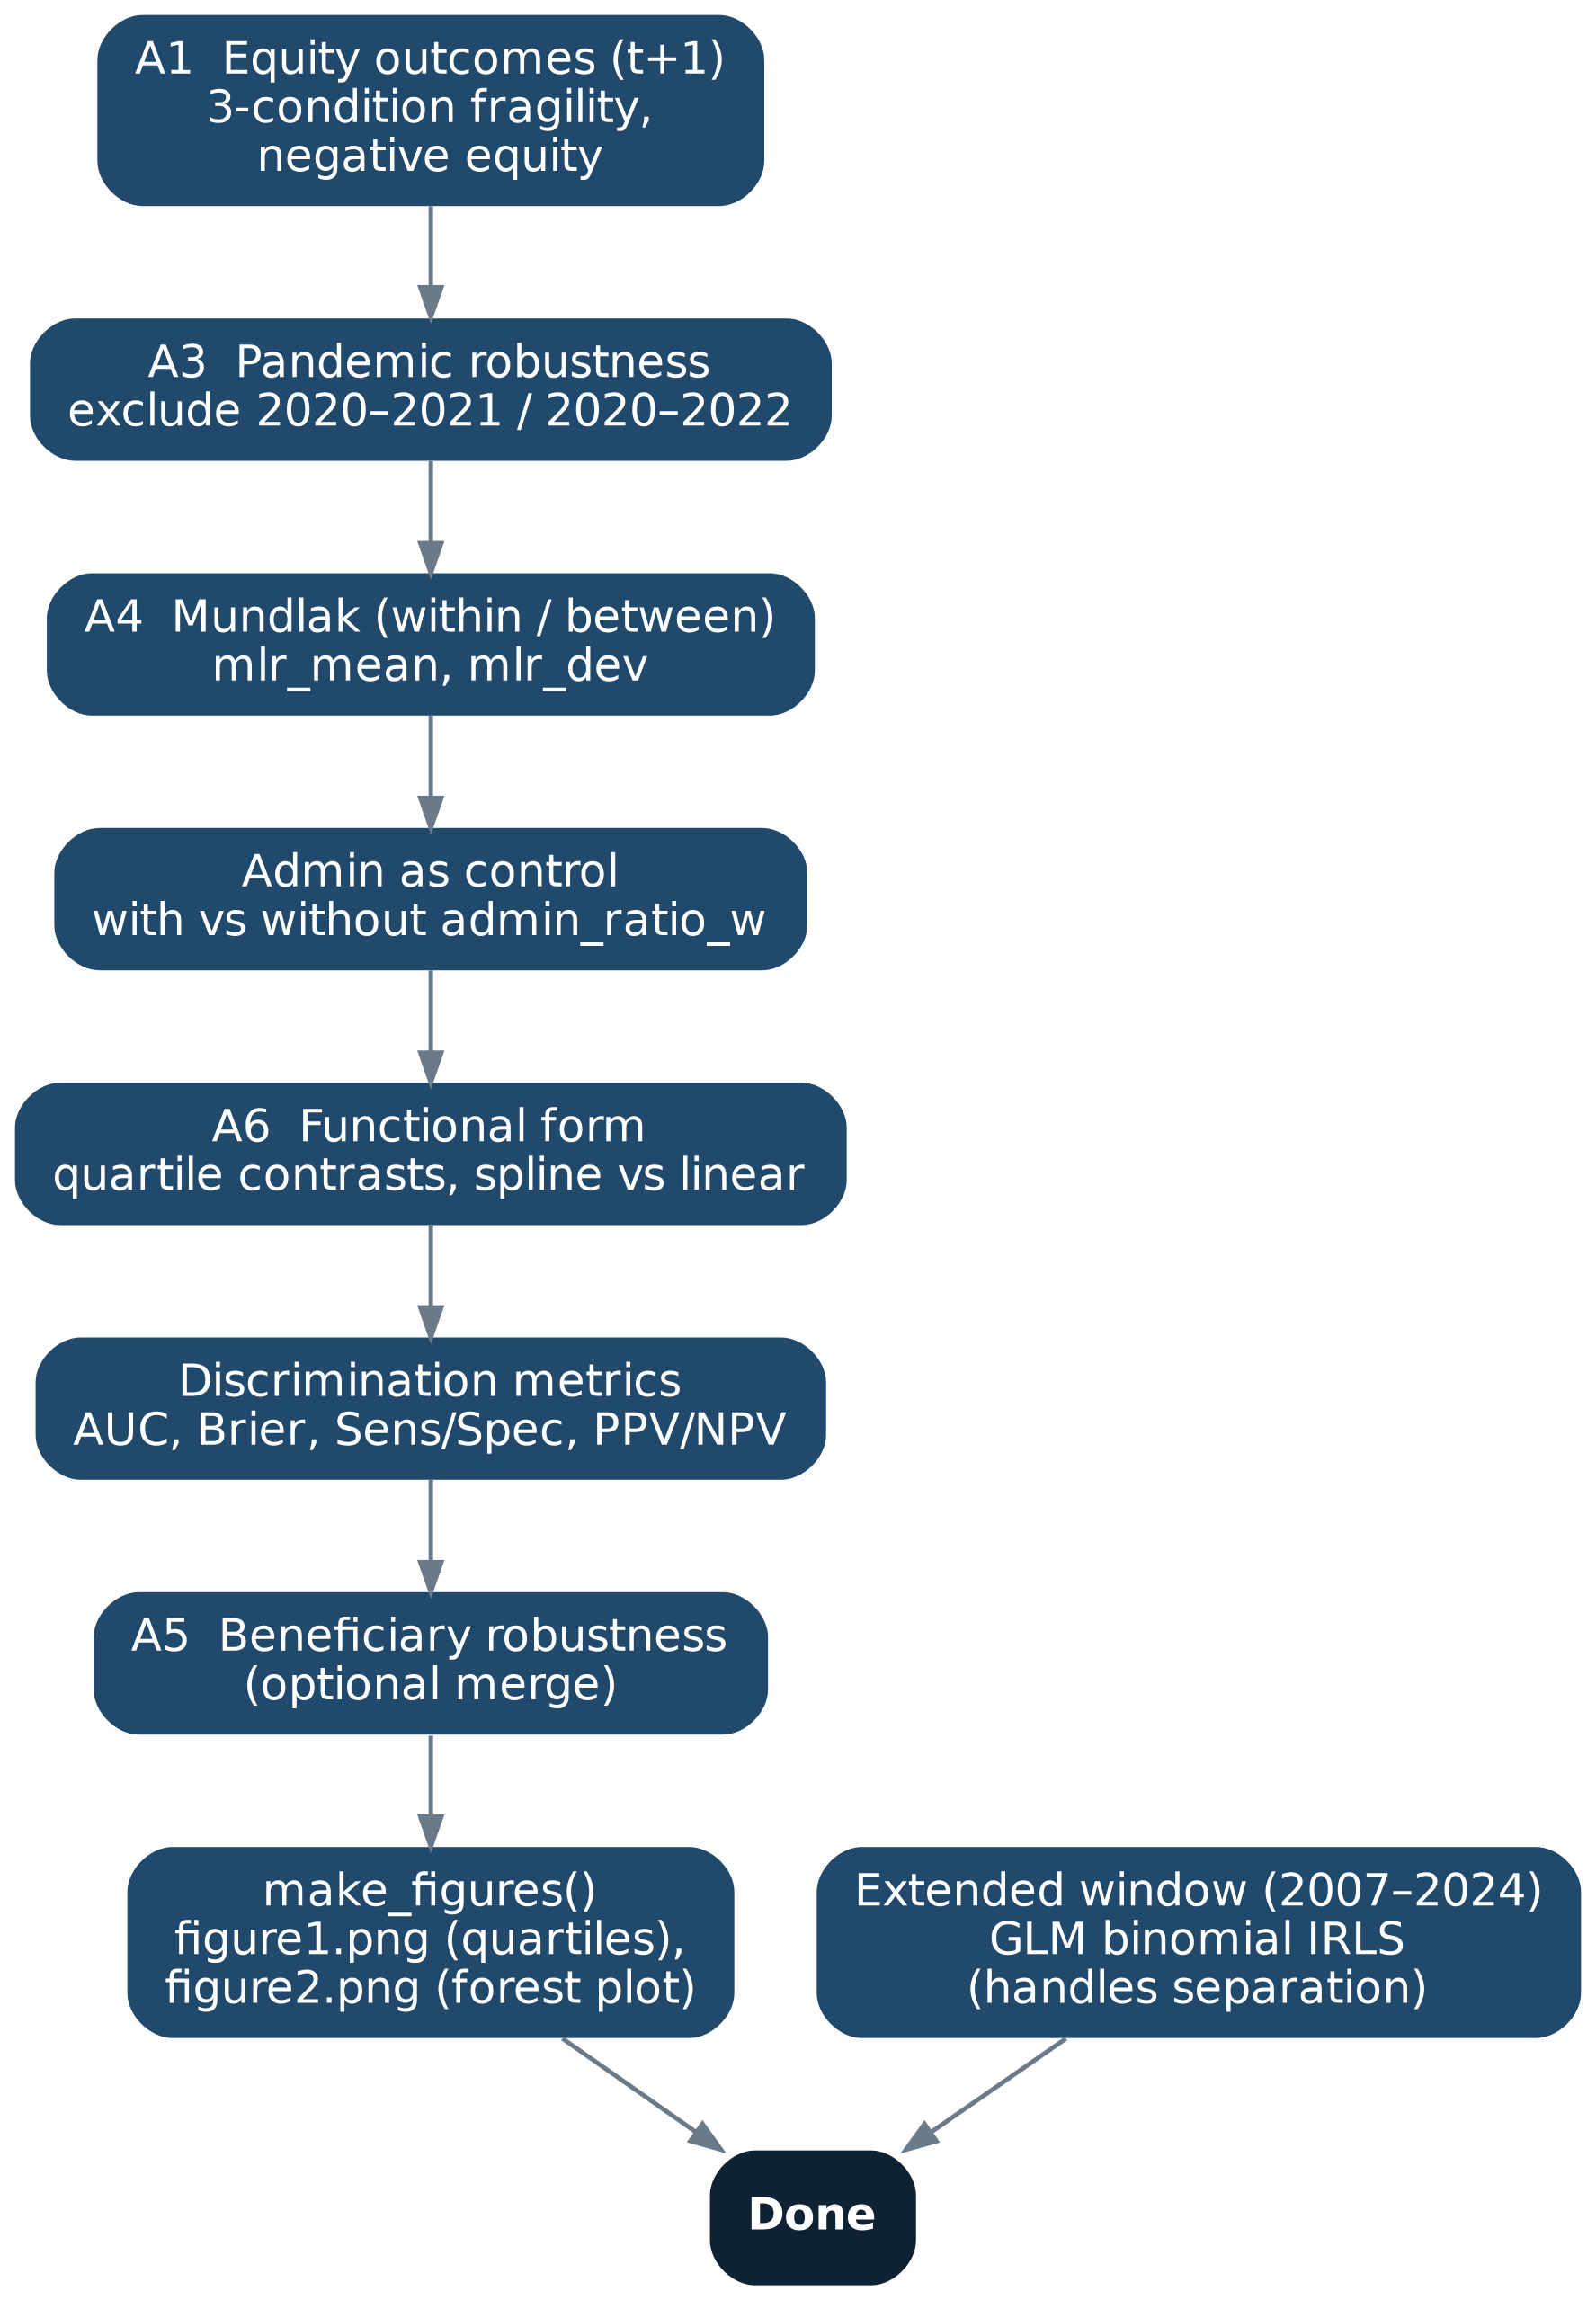


**Fig. A1** Supplementary-analysis pipeline executed on the rebuilt panel: equity-based outcomes (A1), pandemic robustness (A3), the within/between (Mundlak) decomposition (A4), the administrative-expense bad-control check, functional-form tests (A6), discrimination metrics, the beneficiary-scale robustness check (A5), figure generation, and the extended-window (2007–2024) GLM estimation. Rendered from the deposited replication code.

## A1. Equity-based outcomes

With equity restored from DIOPS account 25, the predictive result survives the stricter criteria. A top-quartile loss ratio predicts next-year three-condition fragility, adding negative equity to negative margin and weak liquidity (OR 2.44; 95% CI 1.53–3.89; p < 0.001; 119 events), and next-year negative equity itself (OR 1.74; 95% CI 1.14–2.64; p = 0.010; 173 events). The signal therefore reaches the prudential dimension of patrimonial insufficiency, not only the operating dimension.

| **Outcome (t+1)** | **High-MLR OR [95% CI]** | **p-value** |
| --- | --- | --- |
| Three-condition fragility | 2.44 [1.53, 3.89] | < 0.001 |
| Negative equity | 1.74 [1.14, 2.64] | 0.010 |

## A2. Modality heterogeneity

Table A2 cross-tabulates fragility prevalence by modality and within-window MLR quartile. The upper-tail gradient is visible within the larger modalities (medical cooperatives 3.4% to 12.8% across quartiles; group medicine 7.9% to 17.3%; group dentistry 7.4% to 36.8%; specialized insurers up to 26.5% in the top quartile), while philanthropic operators are elevated across the whole distribution. A formal high-MLR-by-modality interaction is underpowered: several modality-quartile cells contain very few observations or events, producing unstable or perfectly separated interaction coefficients. The cross-tabulation is therefore reported descriptively, and the interaction is not interpreted as a set of point estimates.

**Table A2** Fragility prevalence (%) by modality and MLR quartile; cell counts in brackets.

| **Modality** | **Q1** | **Q2** | **Q3** | **Q4** |
| --- | --- | --- | --- | --- |
| Self-management | 12.5 [24] | 4.7 [107] | 1.4 [145] | 4.2 [522] |
| Medical cooperative | 3.4 [89] | 2.4 [462] | 3.6 [799] | 12.8 [531] |
| Dental cooperative | 7.5 [347] | 1.3 [301] | 0.0 [24] | 0.0 [11] |
| Group medicine | 7.9 [253] | 7.2 [515] | 8.3 [470] | 17.3 [346] |
| Group dentistry | 7.4 [786] | 10.5 [76] | 26.7 [15] | 36.8 [19] |
| Philanthropy | 27.8 [36] | 23.2 [69] | 23.8 [63] | 20.8 [72] |
| Specialized insurer | — [0] | 0.0 [5] | 0.0 [18] | 26.5 [34] |

## A3. Pandemic robustness

The predictive threshold is robust to the pandemic period. Excluding 2020–2021 leaves the top-quartile effect on next-year fragility at OR 1.83 (95% CI 1.24–2.72; p = 0.003); excluding 2020–2022 gives OR 1.60 (95% CI 1.04–2.46; p = 0.033). A high-MLR-by-post-2020 interaction is not significant (OR 1.45; p = 0.20), giving no evidence of a structural break around the pandemic beyond what year fixed effects already absorb.

## A4. Within- versus between-operator variation (Mundlak)

Decomposing the loss ratio into an operator mean and an annual deviation (a Mundlak/correlated-random-effects specification) does not identify a statistically significant within-operator component (OR 1.07 per standard deviation of the deviation; 95% CI 0.96–1.18; p = 0.21). The point estimate is somewhat larger for the between-operator component (OR 1.21 per standard deviation of the operator mean; 95% CI 0.94–1.54; p = 0.14), suggesting that the threshold result may be driven more by structurally higher-loss-ratio operators than by short-term within-operator deviations. However, neither component is significant at conventional levels, so this evidence is imprecise and is interpreted descriptively rather than as a decomposition of the effect.

## A5. Beneficiary scale

Beneficiary counts were reconstructed by operator and year from the ANS consolidated beneficiary series (year-end competências, 2019–2024) and merged to the panel (84% coverage on that window). Log operating revenue and log beneficiaries are strongly correlated (r = 0.78), supporting revenue as a scale proxy. Replacing the size control with log beneficiaries leaves the predictive result essentially unchanged: top-quartile loss ratio predicts next-year fragility (OR 1.89; p < 0.001) and next-year exit (OR 2.58; p = 0.001); the regulatory-exit effect attenuates on the smaller covered subsample (OR 1.72; p = 0.13). Beneficiary scale therefore does not alter the conclusions, and the earlier description of it as merely an optional control is superseded by this robustness check. The series begins in 2019, so 2018 and the extended window are not covered.

| **Outcome (t+1)** | **With log revenue OR** | **With log beneficiaries OR** |
| --- | --- | --- |
| Fragility | 1.76 (p = 0.001) | 1.89 (p < 0.001) |
| Market exit | 3.19 (p < 0.001) | 2.58 (p = 0.001) |
| Forced reg. exit | 2.29 (p = 0.009) | 1.72 (p = 0.131) |

## A6. Functional form and the Q1 anomaly

Two checks support modeling the loss ratio as a threshold rather than a linear term and clarify the non-monotone raw gradient in which the lowest quartile (Q1) shows a higher unadjusted prevalence than the second quartile (Q2). First, taking the empirically lowest-risk quartile (Q2) as the reference in the adjusted model, only the top quartile is significantly elevated (Q4 versus Q2, OR 1.78; 95% CI 1.19–2.68; p = 0.005), while Q1 and Q3 are statistically indistinguishable from Q2 (Q1 versus Q2, OR 1.13; p = 0.55; Q3 versus Q2, OR 0.99; p = 0.95). The elevated unadjusted prevalence in Q1 therefore reflects composition - small or atypical low-claims operators with weak margins for other reasons - and does not survive adjustment, whereas the top-quartile effect does. Second, a formal comparison of functional forms favors nonlinearity: a restricted cubic spline in the loss ratio lowers the Akaike information criterion relative to the linear specification (2574.6 versus 2587.9), and a likelihood-ratio test rejects the linear form (chi-square = 17.3; 2 degrees of freedom; p < 0.001); the quartile specification lies between the two. The top-quartile indicator used in the main models is thus a defensible, parsimonious summary of a genuinely nonlinear, threshold-shaped relationship.

# Appendix B. Methodological and mathematical appendix

This appendix formalizes the empirical methodology and the mathematical structure underlying the article. The design is predictive: the loss ratio observed in year t is related to outcomes observed in t+1, and, for forced regulatory exit, in t+1 or t+2. The main specification uses pooled panel logit models with year fixed effects; controls for size, operator modality, and the administrative-expense ratio; and operator-clustered standard errors. The objective is to estimate predictive content, not causality. Fig. 1 summarizes the corresponding computational pipeline.

## Notation and unit of analysis

The unit of analysis is operator in year , where:

- indexes health plan operators registered under the Brazilian National Supplementary Health Agency (ANS) framework;
- indexes calendar years;
- the primary window covers –;
- the extended window covers –.

The panel is built from the DIOPS quarterly accounting statements, using the fourth quarter of each year, because income-statement accounts are reported on an accumulated annual basis. The rebuilt primary sample contains operator-year observations, operators, and two-condition accounting-fragility events, with prevalence of .

## DIOPS account mapping

All financial variables are reconstructed from DIOPS account groups; the mapping is reproduced as Table 1 in the main text of this article.

To reconstruct the operating result, missing operating-expense accounts in groups 41, 43, 44, and 46 are interpreted as zero, because DIOPS may omit zero-balance accounts. By contrast, revenue, current assets, current liabilities, and equity are not zero-filled: observations lacking those items are excluded by the sample filters.

## Construction of the Medical Loss Ratio

The *Medical Loss Ratio* is reconstructed as the ratio of net claims to net premiums:

This definition corresponds to the conventional claims-ratio scale: higher values indicate that a larger share of operating revenue is absorbed by care-related claims expenses. In the primary window, the MLR has a median of , an interquartile range from to , and approximately of observations above .

### Winsorization

To limit the influence of extreme values, the MLR is winsorized at the 1st and 99th percentiles within each estimation window. Let be the 1st percentile and the 99th percentile of the MLR in the window. The winsorized variable is:

### Standardization by standard deviation

In the continuous specifications, the effect is reported per one standard deviation of the MLR:

where is the sample standard deviation of the winsorized variable. In the primary window, .

### High-MLR indicator

The main nonlinear specification uses a high-MLR indicator, defined by the upper quartile of the within-window distribution:

In the primary window, . Thus, identifies operator-years with claims ratios in the upper quartile.

## Derived accounting variables

### Operating result

The reconstructed operating result is:

### Operating margin

The operating margin is:

The negative-operating-margin condition is:

### Current ratio

The current ratio is:

The weak-liquidity condition is:

### Negative equity

The negative-equity condition is:

In the primary window, operator-year observations with negative equity are identified.

### Administrative-expense ratio

The administrative-expense ratio, used as a control, is:

Because this variable is a component of the operating result, it is a potential *bad control*; therefore, the article reports a robustness analysis excluding this control.

## Definition of outcomes

### Two-condition accounting-based financial fragility

The main accounting-fragility outcome combines a negative operating margin and weak current liquidity:

### Three-condition fragility

With equity restored from DIOPS account 25, a stricter version of fragility can also be defined:

In the primary window, three-condition fragility occurs in operator-year observations.

### Fragility components

The components are also analyzed separately as outcomes in :

This decomposition makes it possible to assess whether the MLR predicts fragility mainly through the operating-margin channel or through the liquidity channel.

### Exit from the regulated market

Market exit is defined as an indicator of cancellation or disappearance of the operator from the panel in the following year:

### Forced regulatory exit

Forced regulatory exit captures adverse cancellation motives, such as extrajudicial liquidation, alternatives to liquidation deliberated by the ANS board, or non-compliance with regulatory norms. The article uses a window of up to two years:

This outcome is central for reducing the risk that the evidence merely reflects a contemporaneous accounting identity, because regulatory exit is external to the operator’s accounting statement.

## Sample-construction filters

The estimation sample retains operator-year observations satisfying the following conditions:

The condition is necessary because the MLR is the main explanatory variable. Observations with missing or non-positive claims do not yield a positive and economically interpretable claims ratio under the conventional definition.

## Main empirical strategy

### Predictive design

The main strategy relates the MLR observed in to future outcomes. For a generic binary outcome , where indexes fragility, negative margin, weak liquidity, market exit, or regulatory exit, the design is:

with the exception of forced regulatory exit, which uses:

The temporal shift is fundamental because a contemporaneous specification could capture only the mechanical relationship between claims ratio and operating margin.

### Logit model with continuous MLR

The first regression form uses the MLR standardized by its standard deviation:

where is the logistic function:

The linear index is:

In this specification:

- is the winsorized and standardized MLR;
- is the size control based on operating revenue;
- is the vector of operator-modality dummies;
- is the administrative-expense ratio;
- represents year fixed effects.

The per-standard-deviation effect is reported as the odds ratio:

### Logit model with the high-MLR indicator

The article’s main specification uses an indicator for MLR in the upper quartile:

The odds ratio associated with the upper quartile is:

This specification is preferred because the results indicate a nonlinear relationship concentrated in the upper quartile rather than a smooth continuous slope across the entire MLR distribution.

### Operator-clustered standard errors

Inference allows arbitrary residual correlation within each operator. Let be the regressor matrix for operator and the associated residual vector. A generic form of the cluster-robust variance matrix is:

where denotes the logit/GLM weight matrix. This correction is important because observations from the same operator across different years are not independent.

## Contemporaneous benchmark

The article estimates a contemporaneous specification only as a descriptive reference:

This regression does not support the article’s main claims because the MLR and operating margin share accounting components in the same year. Its role is only to compare the contemporaneous magnitude with the predictive evidence.

## Functional form: quartiles and nonlinearity

### Quartile model

To assess whether the association is monotonic or concentrated in a specific region of the distribution, define:

where denotes the interval corresponding to quartile . Taking the second quartile as the empirical lowest-risk reference, estimate:

The odds ratios for each quartile relative to the second quartile are:

### Restricted cubic spline and likelihood-ratio test

An additional check compares the linear MLR specification with a flexible restricted-cubic-spline form:

where represents a restricted cubic spline function. The comparison uses the Akaike information criterion:

where is the number of estimated parameters and is the maximized log-likelihood. The likelihood-ratio statistic comparing the models is:

with equal to the difference in the number of parameters. In the article, the spline specification improves the AIC and rejects the purely linear form, supporting the threshold interpretation.

## Supplementary analyses

### Equity-based outcomes

With equity restored from account 25, two additional outcomes are tested:

These models assess whether high claims ratios predict not only operating and liquidity weakness but also patrimonial insufficiency.

### Robustness to the pandemic period

To assess whether the association depends on the pandemic period, the main model is estimated in subsets excluding affected years:

An interaction between high MLR and the post-2020 period may also be included:

### Within–between decomposition: Mundlak specification

To distinguish between-operator variation from within-operator variation over time, define the operator-level mean of the standardized MLR:

where is the number of observed years for operator . The within-operator deviation is:

The Mundlak specification is:

In this formulation, captures structural differences between operators with higher or lower average MLR, while captures temporary deviations of an operator from its own mean.

### Alternative control for beneficiary scale

As an alternative scale control, is replaced by beneficiaries:

This analysis is limited to the window with beneficiary-count coverage, but it verifies whether using revenue as a size proxy changes the conclusions.

## Evaluation of discrimination

Statistical significance of the MLR does not imply that it is a sufficient classifier. Therefore, the article separates predictive association from discriminatory performance.

### Brier score

For predicted probabilities and observed outcomes , the Brier score is:

Lower values indicate better average calibration of predicted probabilities.

### AUC

The area under the ROC curve can be interpreted as the probability that the model assigns a higher score to an event than to a non-event:

In the article, the MLR alone has an AUC close to , whereas the full model with controls performs substantially better.

### Classification matrix for the high-MLR indicator

For the indicator , define:

The metrics are:

The article’s evidence shows that the high-MLR indicator has high specificity and negative predictive value, but low sensitivity and low positive predictive value. Therefore, the MLR is a useful warning dimension but is insufficient as a stand-alone classifier.

## Heterogeneity by operator modality

Heterogeneity by modality is incorporated in the models through category dummies:

where one modality is omitted as the reference category. Fragility prevalence differs sharply across modalities, justifying that any supervisory application of the MLR should be segmented by operator type.

A formal interaction could be written as:

but in the article this interaction is treated cautiously because some modality–quartile cells contain very few events, generating unstable estimates or perfect separation. For this reason, heterogeneity is presented mainly descriptively.

## Interpretation of coefficients

In logit models, coefficients are estimated in log-odds. For a coefficient , the corresponding odds ratio is:

When , the variable is associated with higher odds of the outcome; when , it is associated with lower odds. For example, if for fragility in , the odds of next-year fragility are approximately higher for observations in the upper MLR quartile, conditional on the model controls.

The 95% confidence interval for the odds ratio is obtained from the coefficient standard error:

## Summary of the methodological logic

The methodology can be summarized in five steps:

1. rebuild the operator-year panel from the DIOPS universe, avoiding complete-case selection that would exclude the financially distressed tail;
2. reconstruct the MLR, operating margin, current ratio, and equity directly from regulatory accounts;
3. define accounting-based fragility as the combination of negative operating margin and weak current liquidity, while reporting the stricter three-condition equity-based version as a supplementary analysis;
4. estimate predictive logit models in which the MLR in predicts outcomes in or, for forced regulatory exit, in ;
5. assess whether the MLR is merely statistically associated with the outcomes or whether it also has sufficient discriminatory capacity for use as an independent classifier.

## Interpretive limits

The strategy is explicitly predictive, not causal. The association between high MLR and future fragility may reflect claims pressure, pre-existing operating weakness, structural characteristics of operators, or regulatory mechanisms. The temporal shift and the use of outcomes external to the accounting statement reduce the possibility that the result is only an accounting identity, but they do not eliminate endogeneity, reverse causality, or accounting discretion in claims measurement.

The methodological conclusion is that the MLR is a transparent and replicable marker of elevated risk, especially as an upper-quartile threshold, but it should be used together with modality, size, liquidity, equity, operating history, and other regulatory indicators.
